# Supplementary material for: Influences of Kinesio Taping with Therapeutic Exercise in Patients with Low Back Pain
Source: MDPI journal article supplement (doi:10.3390/healthcare9080927), 2021-07-22
Supplement: s1 [file s1]

Figure S1. Protocol for core stability exercise

|                                                                                                               |                                                                                                                                                                             |                                                                                      |                                                                                          |
|---------------------------------------------------------------------------------------------------------------|-----------------------------------------------------------------------------------------------------------------------------------------------------------------------------|--------------------------------------------------------------------------------------|------------------------------------------------------------------------------------------|
| Phase 1(10 sessions )<br>:Independent isometric contraction of the transversus abdominis (trA) and multifidus |                                                                                           |                                                                                      |                                                                                          |
|                                                                                                               | hooklying                                                                                                                                                                   | supine                                                                               | quadruped                                                                                |
|                                                                                                               | Isolated isometric contraction of TrA: Drawing the belly button toward the spine without moving the back                                                                    |                                                                                      |                                                                                          |
|                                                                                                               |                                                                                           |                                                                                      |       |
|                                                                                                               | Sitting: Lift the opposite arm while feeling the multifidus muscle contracting                                                                                              |                                                                                      | Standing: Stepping your feet alternately while feeling the multifidus muscle contracting |
|                                                                                                               | Isolated isometric contraction of Multifidus muscle                                                                                                                         |                                                                                      |                                                                                          |
| Phase 2 (10 sessions)<br>:Co-contraction and functional tasks of the deep trunk muscles                       |                                                                                         |                                                                                      |                                                                                          |
|                                                                                                               | Co-contraction of lumbar stabilizing muscle: sitting                                                                                                                        |                                                                                      |                                                                                          |
|                                                                                                               |                                                                                         |                                                                                      |                                                                                          |
|                                                                                                               | Co-contraction of lumbar stabilizing muscle: maintaining the co- contraction of the lumbar stabilizing muscles while sitting on an unstable surface                         |                                                                                      |                                                                                          |
|                                                                                                               |                                                                                          |  |                                                                                          |
|                                                                                                               | Segmental movement of the thoracic or hip joints: Segmental movement of the thoracic or hip joints while maintaining the co-contraction of the lumbar stabilization muscles |                                                                                      |                                                                                          |

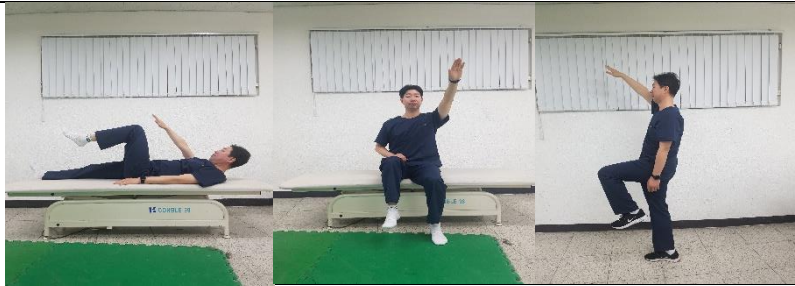

Alternately lifting the arms or legs in multiple positions  
(supine, quadruped, sitting, standing)

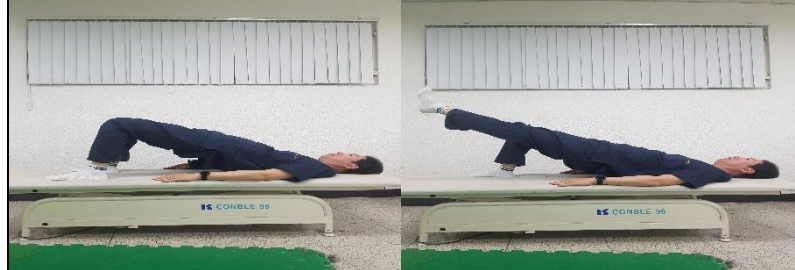

Bridging exercise

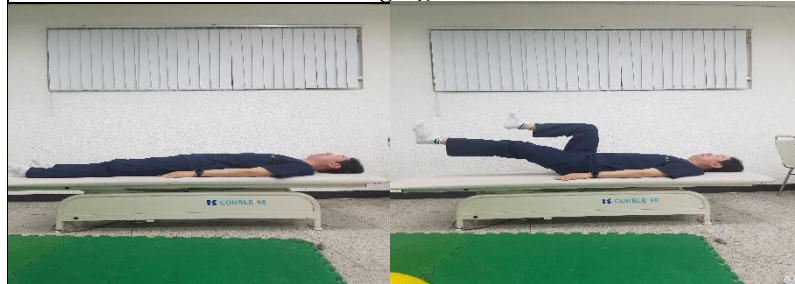

Cycling in a supine position

Phase 3 (10 sessions):  
Functional task with load—the  
exercises in phase 2 were  
performed with an external load  
applied to the wrist and ankle.

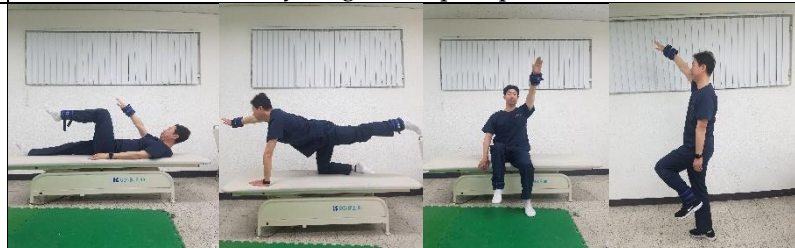

Alternately lifting the arms or legs in multiple positions  
(supine, quadruped, sitting, standing)

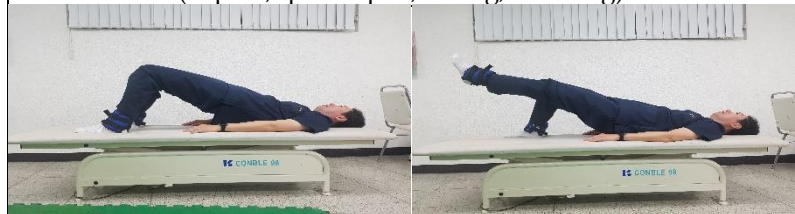

Bridging exercise

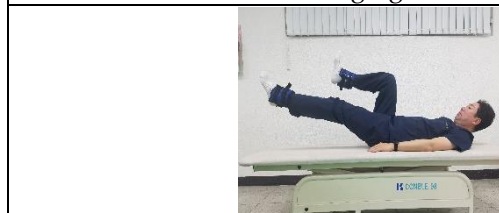

Cycling in a supine position

Phase 4 (10 sessions)  
Functional task with an  
unstable surface;

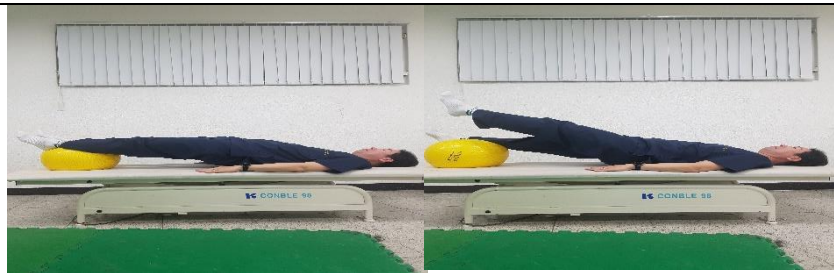

Bridging exercise with a balance ball placed under the leg

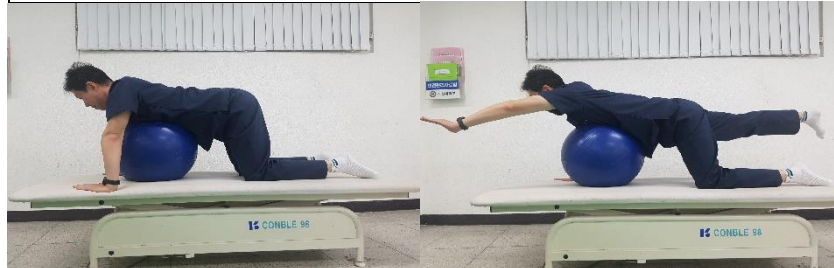

Alternately raising the arms and legs in a four-legged posture with the chest rested on the balance ball

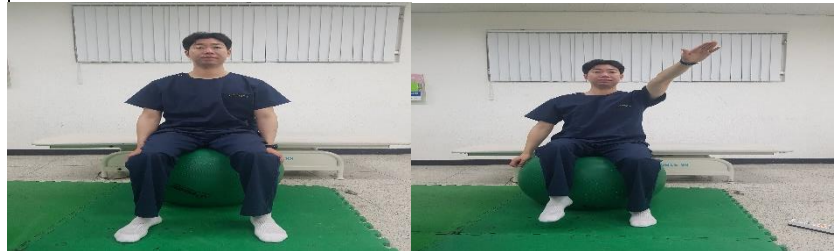

Alternately raising the arms and legs while sitting on the balance ball

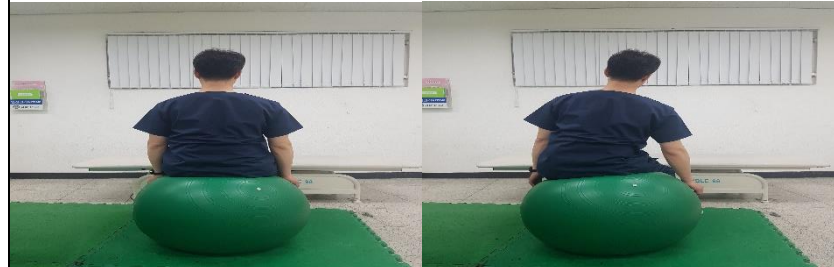

Side bending the trunk while sitting on the balance ball.

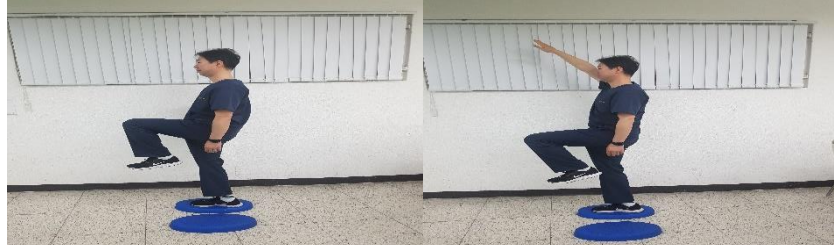

Alternately raising the arms and legs while standing on a balance pad

Note. Before and after exercise, 5 minutes of warm-up and cool-down were provided. Subjects were instructed to maintain a neutral lumbar spine position while performing all functional movements.

\*This protocol was modified by adopting the exercise method used in the studies of shamsi et al. [8].
